# Supplementary material for: Buffering Mitigates Chondrocyte Oxidative Stress, Metabolic Dysfunction, and Death Induced by Normal Saline: Formulation of a Novel Arthroscopic Irrigant
Source: MDPI journal article supplement (doi:10.3390/ijms25021286), 2024-01-20
Supplement: s1 [file s1]

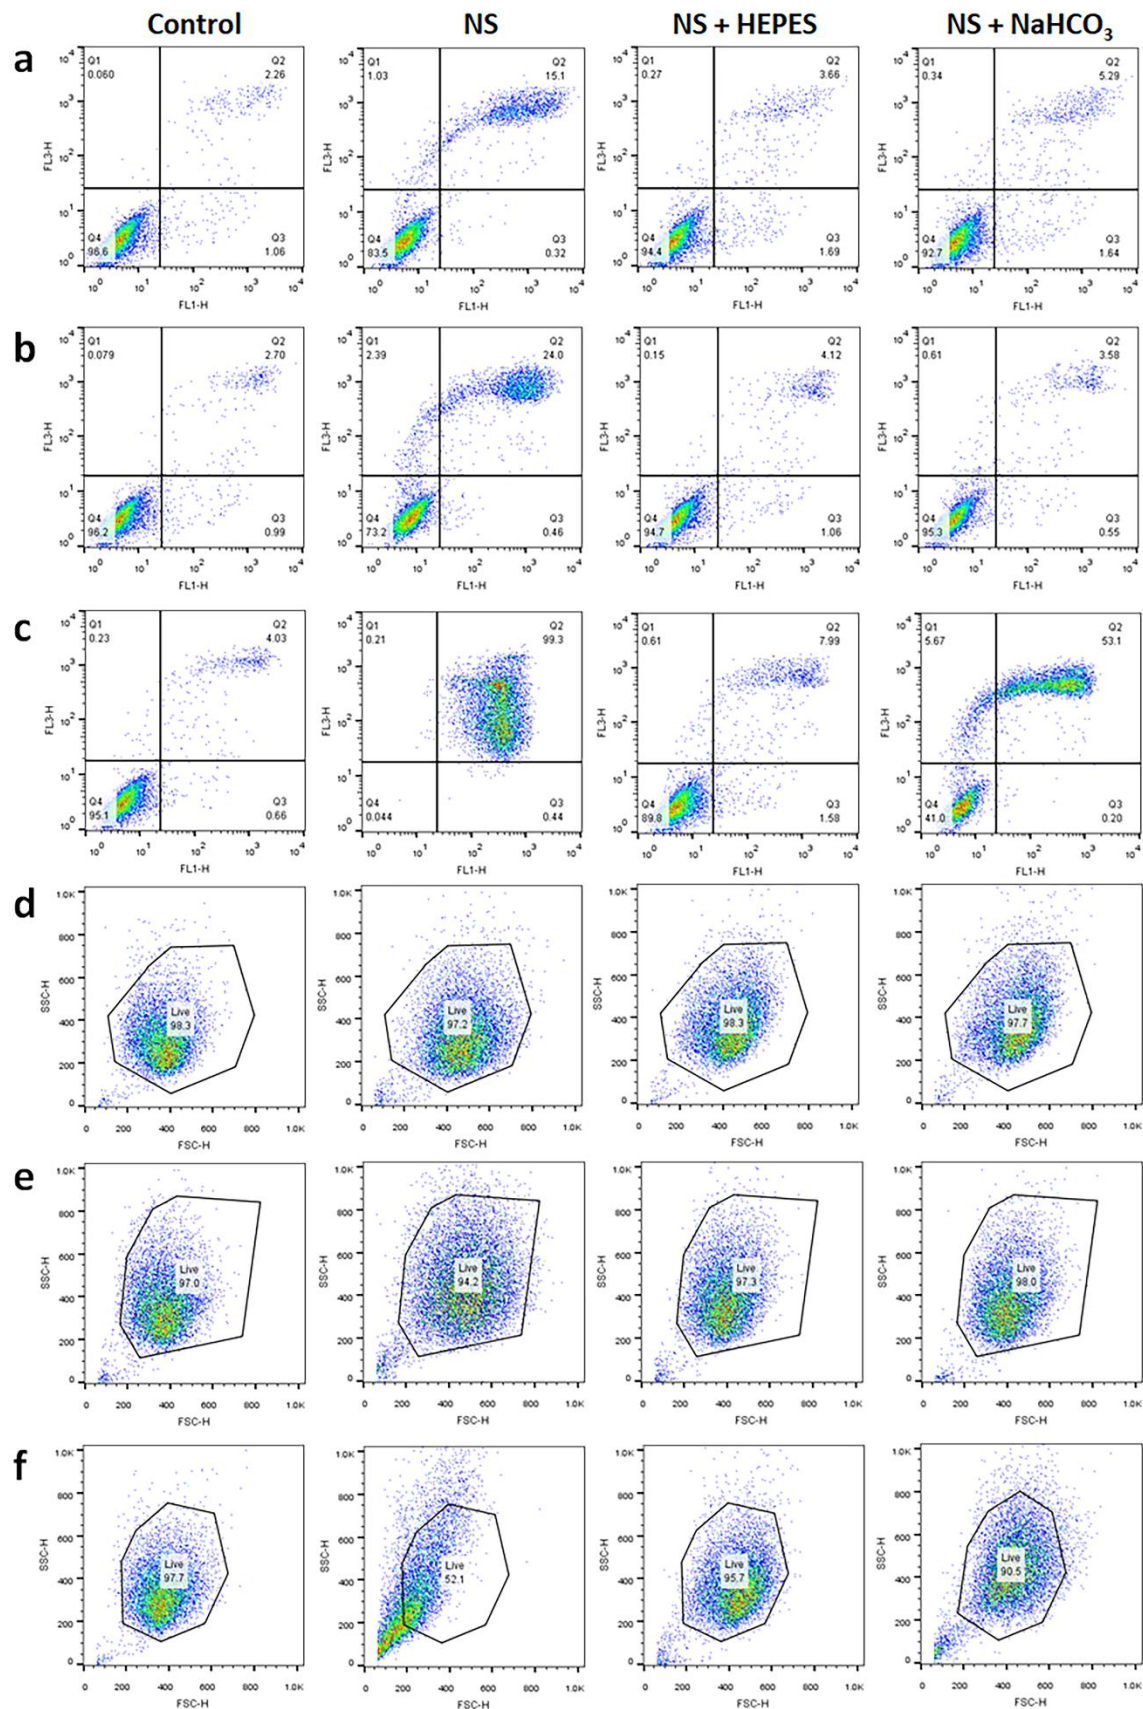

**Supplementary Figure S1.** Effect of normal saline (NS) and buffers (25 mM HEPES or 0.5 mM sodium bicarbonate) on chondrocyte death using a flow cytometer. (a-c) Representative plots for annexin V (FL1-H; x-axis)/propidium iodide (PI) (FL3-H; y-axis) staining after irrigant incubation for 30 minutes (a), 1 hour (b), and 3 hours (c). Q1: annexin V negative/PI positive, Q2: annexin V positive / PI positive, Q3: annexin V positive / PI negative, Q4: annexin V negative / PI negative. (d-f) Representative FSC vs SSC plots for cell morphology after irrigant incubation for 30 minutes (d), 1 hour (e), and 3 hours (f). FSC-H (forward scatter height; x-axis) and SSC-H (side scatter height; y-axis) represent cell size and granularity, respectively.

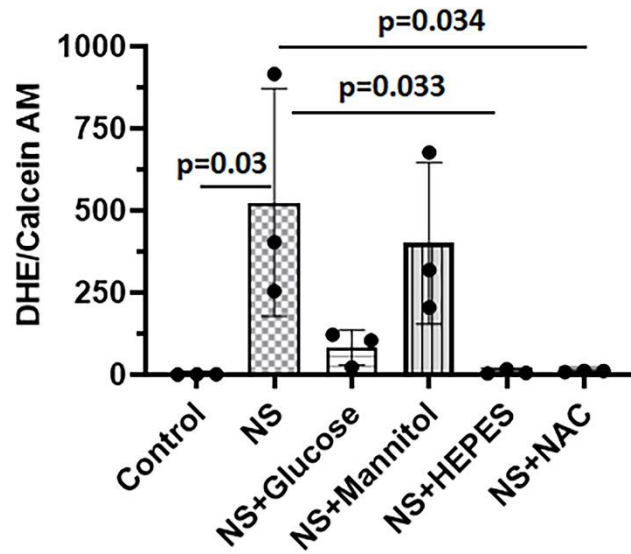

**Supplementary Figure S2.** Effect of 0.9% normal saline (NS) and various supplements on oxidative stress in monolayer primary bovine chondrocytes. Glucose (Sigma-Aldrich): 31.52 mM, Mannitol (Research Products International): 31.52 mM, HEPES: 25 mM, NAC (Sigma-Aldrich): 2.5 mM with 26 mM sodium bicarbonate (Research Products International) (n = 3).

**Supplementary Table S1.** List of metabolites showing  $\geq 2$ -fold changes between control and 0.9% normal saline (NS). Chondrocytes were treated with each irrigation solution for 30 minutes (n = 6). Positive values of fold change (up): NS or NS + HEPES > control, negative values of fold change (down): NS or NS + HEPES < control.

|                                                             | NS <i>versus</i> Control |         | NS + HEPES <i>versus</i> Control |         |
|-------------------------------------------------------------|--------------------------|---------|----------------------------------|---------|
| Metabolites (up)                                            | Fold change              | p-value | Fold change                      | p-value |
| Glucose 6-phosphate                                         | 70.3                     | 5.9E-09 | 23.4                             | 1.5E-04 |
| Ribose 5-phosphate                                          | 34.3                     | 5.8E-09 | 6.8                              | 1.2E-02 |
| Fructose 6-phosphate                                        | 7.5                      | 5.9E-09 | 2.8                              | 7.6E-04 |
| O-octanoyl-R-carnitine                                      | 5.0                      | 1.1E-07 | 7.0                              | 6.2E-09 |
| D-Ribulose 5-phosphate                                      | 4.2                      | 5.8E-09 | 2.0                              | 1.6E-05 |
| O-propanoyl-carnitine                                       | 4.2                      | 1.9E-08 | 3.9                              | 6.1E-08 |
| Inosine                                                     | 3.2                      | 5.8E-09 | 0.6                              | 4.8E-03 |
| Mannose                                                     | 3.0                      | 6.3E-08 | 1.9                              | 6.8E-04 |
| Guanosine                                                   | 2.9                      | 5.9E-09 | 1.7                              | 1.2E-04 |
| Adenosine monophosphate (AMP)                               | 2.3                      | 5.8E-09 | 0.8                              | 9.1E-03 |
| Nicotinamide adenine dinucleotide phosphate (NADP+)         | 2.2                      | 7.7E-08 | 1.7                              | 8.1E-05 |
| Deoxyguanosine diphosphate (dGDP)                           | 2.2                      | 5.8E-09 | 0.6                              | 3.3E-05 |
| O-hexanoyl-R-carnitine                                      | 2.1                      | 2.7E-08 | 2.1                              | 2.3E-08 |
| Metabolites (down)                                          | Fold change              | p-value | Fold change                      | p-value |
| Reduced nicotinamide adenine dinucleotide phosphate (NADPH) | -31.1                    | 6.6E-09 | -0.8                             | 7.2E-04 |
| Alpha-Ketoglutarate (KG)                                    | -22.0                    | 5.8E-09 | -15.5                            | 5.8E-09 |
| Alpha-Ketoisovalerate (KIV)                                 | -12.4                    | 6.1E-09 | -4.8                             | 8.3E-09 |
| Cytidine triphosphate (CTP)                                 | -11.8                    | 5.8E-09 | -1.4                             | 5.7E-06 |
| Alpha-Keto-beta-Methylvalerate (KMV)                        | -10.2                    | 5.8E-09 | -10.2                            | 5.8E-09 |
| Nicotinamide adenine dinucleotide + hydrogen (NADH)         | -9.6                     | 1.2E-07 | -0.8                             | 7.0E-03 |
| O-oleoylcarnitine                                           | -9.1                     | 1.2E-05 | -1.0                             | 9.8E-01 |
| Alpha-Ketoisocaproate (KIC)                                 | -9.0                     | 5.8E-09 | -6.8                             | 5.8E-09 |
| Lactate                                                     | -7.2                     | 5.8E-09 | -3.3                             | 5.8E-09 |
| Xanthosine                                                  | -5.7                     | 0.020   | -0.6                             | 4.4E-02 |
| Pyruvic acid                                                | -5.5                     | 5.8E-09 | -2.6                             | 6.4E-09 |
| Cytidine diphosphate (CDP)                                  | -4.8                     | 5.8E-09 | -2.2                             | 5.8E-09 |
| Oxidized glutathione (GSSG)                                 | -4.8                     | 7.9E-08 | -1.7                             | 1.4E-04 |
| O-Phosphoethanolamine                                       | -4.4                     | 7.1E-09 | -3.6                             | 9.1E-09 |

|                                          |      |         |      |         |
|------------------------------------------|------|---------|------|---------|
| Dihydroxyacetone phosphate (DHAP)        | -4.1 | 5.8E-09 | -2.2 | 5.8E-09 |
| Beta-Hydroxybutyrate (3-Hydroxybutyrate) | -3.8 | 5.8E-09 | -2.3 | 5.9E-09 |
| Inosine monophosphate (IMP)              | -3.8 | 1.4E-07 | -1.8 | 8.2E-05 |
| Malate                                   | -3.7 | 1.7E-08 | -7.3 | 6.9E-09 |
| Citrulline                               | -3.7 | 5.8E-09 | -3.6 | 5.8E-09 |
| Deoxythymidine triphosphate (dTTP)       | -3.6 | 7.4E-07 | -2.4 | 9.4E-06 |
| Succinic acid                            | -3.5 | 8.1E-09 | -4.2 | 6.7E-09 |
| Guanosine triphosphate (GTP)             | -3.2 | 6.0E-09 | -0.9 | 4.5E-01 |
| Hypoxanthine                             | -3.1 | 4.8E-07 | -1.0 | 0.838   |
| Fumarate                                 | -3.0 | 8.3E-08 | -3.7 | 2.7E-08 |
| Glutarylcarntine                         | -3.0 | 5.9E-09 | -1.8 | 2.8E-08 |
| Pyruvate                                 | -2.9 | 5.8E-09 | -2.0 | 5.9E-09 |
| Adenosine diphosphate (ADP) ribose       | -2.9 | 6.1E-09 | -1.6 | 6.3E-07 |
| Carnitine                                | -2.9 | 5.8E-09 | -1.4 | 1.7E-08 |
| Lysine                                   | -2.8 | 5.8E-09 | -2.3 | 5.8E-09 |
| Malic acid                               | -2.8 | 1.8E-06 | -4.0 | 2.3E-07 |
| Fumaric acid                             | -2.8 | 2.9E-06 | -4.1 | 3.4E-07 |
| Uridine triphosphate (UTP)               | -2.5 | 5.8E-09 | -1.0 | 0.506   |
| Deoxyadenosine triphosphate (dATP)       | -2.4 | 5.8E-09 | -1.6 | 2.2E-08 |
| Citric acid                              | -2.4 | 5.7E-04 | -2.5 | 4.8E-04 |
| Deoxyguanosine triphosphate (dGTP)       | -2.1 | 6.2E-09 | -0.9 | 3.6E-04 |
